# Supplementary material for: The impact of postharvest storage and cooking time on mineral bioaccessibility in common beans
Source: Royal Society of Chemistry journal article supplement (doi:10.1039/d0fo01302a), 2020-01-01
Supplement: d0fo01302a1.pdf [file d0fo01302a1.pdf]

**Supplementary figure 1**

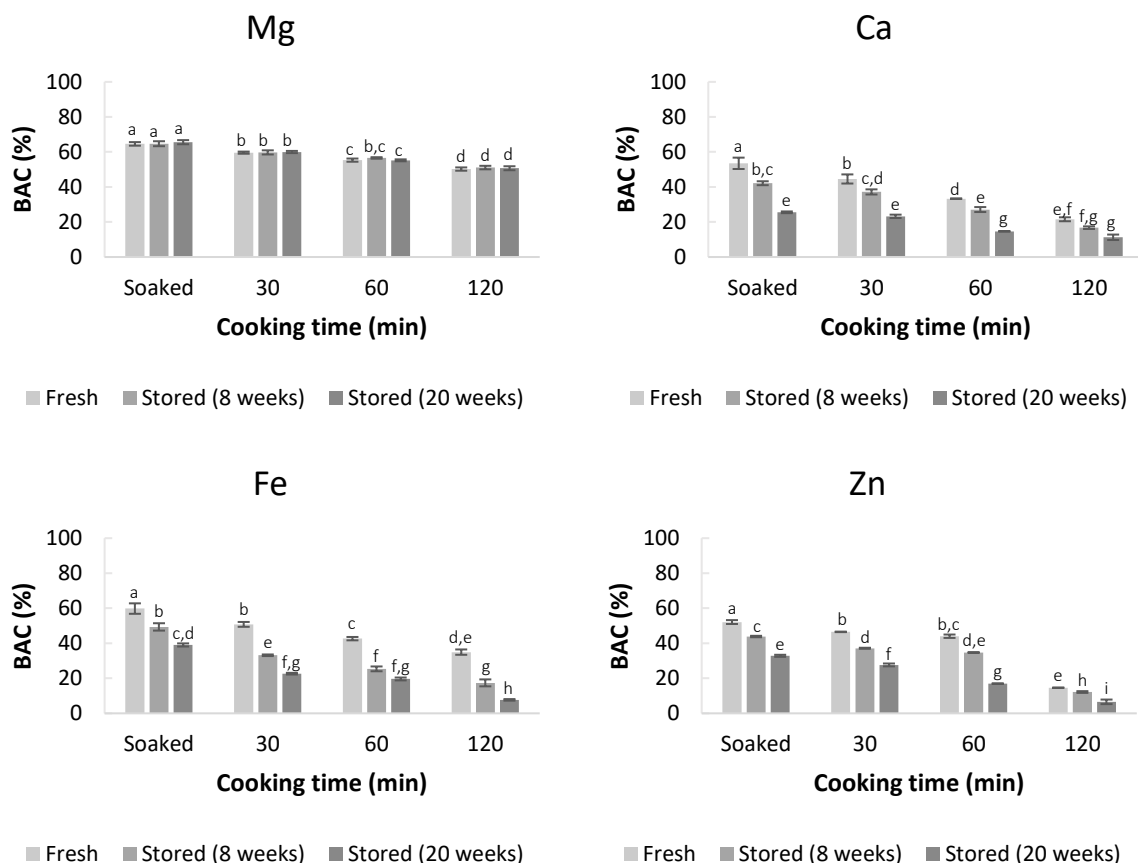

**Supplementary figure 1.** Mineral bioaccessibility (BAC) (%) of soaked and/or cooked whole beans (cooking time: 30, 60 or 120 min). Average values  $\pm$  standard errors. Mineral bioaccessibility experiments were performed in duplicate. Different lower case letters (a-i) indicate significant differences ( $p < 0.05$ ) between samples for a certain mineral.

**Supplementary figure 2**

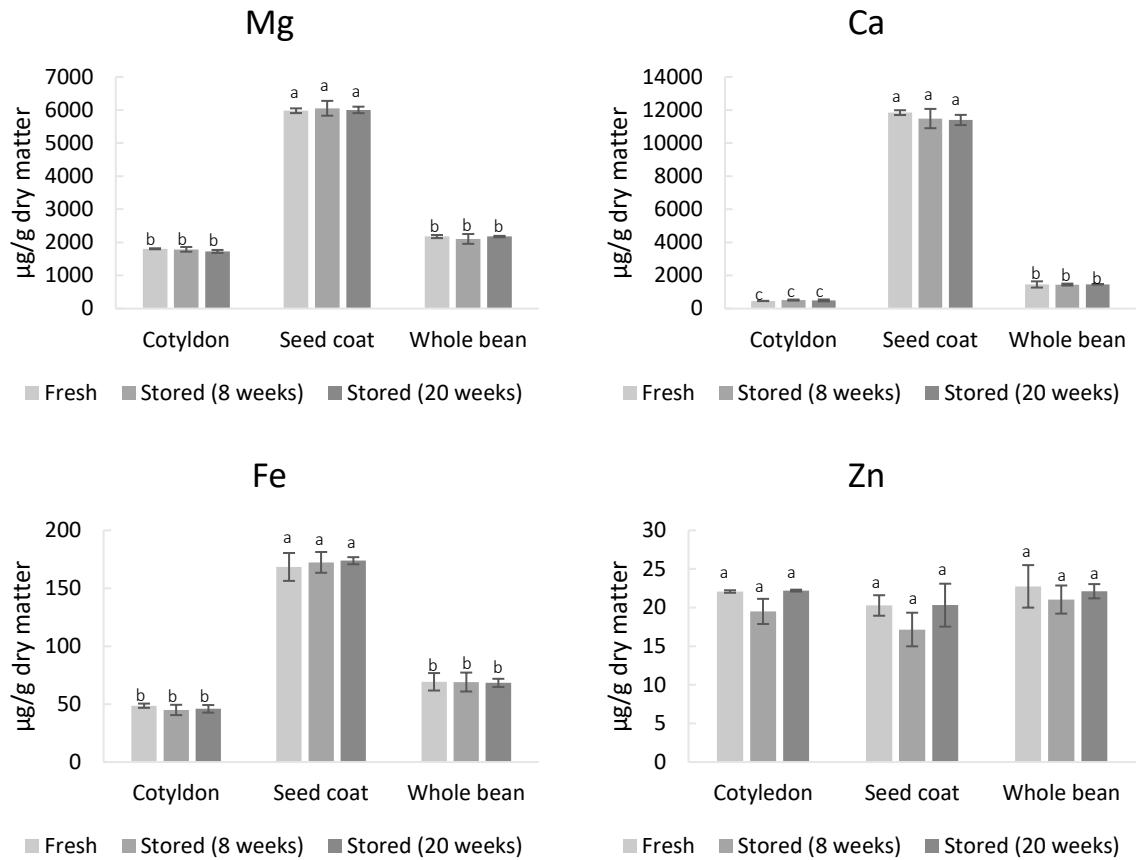

**Supplementary figure 2.** Mineral content ( $\mu\text{g/g}$  dry matter) in cotyledon, seed coat and whole beans. Average value  $\pm$  standard errors. Determination of mineral content was performed in duplicate. Different lower case letters (a-c) indicate significant differences ( $p < 0.05$ ) between samples for a certain mineral

**Supplementary table 1A.** Measured values (average  $\pm$  standard error) of certified reference material: BCR-129 (Joint Research Centre, European Commission). n=6. To have an appropriate accuracy of the method used, the measured values should be within a 10% range of the certified values.

|                                | Mg                | Ca                | Fe                | Zn                |
|--------------------------------|-------------------|-------------------|-------------------|-------------------|
| <b>Certified values (mg/g)</b> | 1.450             | 6.400             | 0.114             | 0.032             |
| <b>Measured values (mg/g)</b>  | 1.554 $\pm$ 0.068 | 6.947 $\pm$ 0.197 | 0.116 $\pm$ 0.016 | 0.031 $\pm$ 0.002 |
| <b>Certified value -10%</b>    | 1.305             | 5.760             | 0.103             | 0.029             |
| <b>Certified value +10%</b>    | 1.595             | 7.040             | 0.125             | 0.035             |

**Supplementary table 1B.** 10 mg raw common bean powder was spiked with ZnSO<sub>4</sub>·7H<sub>2</sub>O, incinerated and ashes were dissolved in 10 mL 1% HNO<sub>3</sub> solution prior to mineral analysis by ICP-OES. ZnSO<sub>4</sub>·7H<sub>2</sub>O was added to obtain an additional concentration of 1, 2 and 3 Zn mg/g sample. Mineral concentration is expressed as mg/g sample. n=2.

|                             | Mg                | Ca                | Fe                | Zn                |
|-----------------------------|-------------------|-------------------|-------------------|-------------------|
| <b>Sample</b>               | 2.062 $\pm$ 0.052 | 1.516 $\pm$ 0.032 | 0.071 $\pm$ 0.003 | 0.024 $\pm$ 0.004 |
| <b>Sample + Zn (1 mg/)</b>  | 2.010 $\pm$ 0.012 | 1.494 $\pm$ 0.044 | 0.068 $\pm$ 0.002 | 1.018 $\pm$ 0.040 |
| <b>Sample + Zn (2 mg/L)</b> | 2.022 $\pm$ 0.017 | 1.539 $\pm$ 0.050 | 0.067 $\pm$ 0.006 | 2.023 $\pm$ 0.010 |
| <b>Sample + Zn (3 mg/L)</b> | 2.078 $\pm$ 0.093 | 1.517 $\pm$ 0.150 | 0.071 $\pm$ 0.003 | 3.093 $\pm$ 0.110 |

**Supplementary table 2.** Amount of leached minerals during soaking and cooking ( $\mu\text{g/g}$  dry raw bean) for fresh, 8 weeks and 20 weeks stored beans ( $35^\circ\text{C}$  and 80% R.H.). Average value  $\pm$  standard errors.

|                        | Leached Mg ( $\mu\text{g/g}$ dry raw bean) |                       |                        | Leached Ca ( $\mu\text{g/g}$ dry raw bean) |                       |                        | Leached Fe ( $\mu\text{g/g}$ dry raw bean) |                       |                        | Leached Zn ( $\mu\text{g/g}$ dry raw bean) |                       |                        |
|------------------------|--------------------------------------------|-----------------------|------------------------|--------------------------------------------|-----------------------|------------------------|--------------------------------------------|-----------------------|------------------------|--------------------------------------------|-----------------------|------------------------|
|                        | <i>Fresh</i>                               | <i>8 weeks stored</i> | <i>20 weeks stored</i> | <i>Fresh</i>                               | <i>8 weeks stored</i> | <i>20 weeks stored</i> | <i>Fresh</i>                               | <i>8 weeks stored</i> | <i>20 weeks stored</i> | <i>Fresh</i>                               | <i>8 weeks stored</i> | <i>20 weeks stored</i> |
| <b>Soaking</b>         | 118.4 $\pm$ 3.2                            | 427.5 $\pm$ 7.5       | 751.1 $\pm$ 14.7       | 68.2 $\pm$ 1.2                             | 125.6 $\pm$ 3.8       | 169.1 $\pm$ 3.8        | 1.4 $\pm$ 0.1                              | 1.6 $\pm$ 0.1         | 3.1 $\pm$ 0.1          | 0.7 $\pm$ 0.1                              | 2.5 $\pm$ 0.1         | 3.3 $\pm$ 0.0          |
| <b>30 min cooking</b>  | 492.4 $\pm$ 6.3                            | 417.5 $\pm$ 20.2      | 272.1 $\pm$ 14.9       | 81.6 $\pm$ 2.1                             | 55.9 $\pm$ 4.3        | 43.1 $\pm$ 2.3         | 6.1 $\pm$ 0.1                              | 5.2 $\pm$ 0.4         | 4.6 $\pm$ 0.1          | 2.9 $\pm$ 0.1                              | 2.1 $\pm$ 0.1         | 1.7 $\pm$ 0.1          |
| <b>60 min cooking</b>  | 770.6 $\pm$ 36.6                           | 589.6 $\pm$ 31.3      | 344.3 $\pm$ 22.1       | 99.1 $\pm$ 7.6                             | 68.2 $\pm$ 0.7        | 53.8 $\pm$ 0.1         | 7.6 $\pm$ 0.2                              | 6.7 $\pm$ 0.8         | 6.4 $\pm$ 0.2          | 4.3 $\pm$ 0.1                              | 2.6 $\pm$ 0.3         | 2.3 $\pm$ 0.2          |
| <b>120 min cooking</b> | 1049.5 $\pm$ 23.5                          | 670.1 $\pm$ 23.9      | 397.1 $\pm$ 37.8       | 110.3 $\pm$ 3.5                            | 79.2 $\pm$ 3.4        | 63.1 $\pm$ 1.3         | 9.1 $\pm$ 0.4                              | 7.7 $\pm$ 0.4         | 7.3 $\pm$ 0.5          | 5.1 $\pm$ 0.2                              | 3.1 $\pm$ 0.3         | 2.7 $\pm$ 0.1          |
